# Supplementary material
Source: Copernicus journal article supplement (doi:10.5194/amt-19-3999-2026)
Supplement: Supplementary file [file amt-19-3999-2026-supplement-title-page.pdf › amt-19-3999-2026-supplement-title-page.pdf]

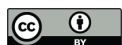

## *Supplement of*

# **Bayesian denoising of satellite images using co-registered NO<sub>2</sub> images**

**Erik Franciscus Maria Koene et al.**

*Correspondence to:* Erik Franciscus Maria Koene (erik.koene@empa.ch)

- amt-19-3999-2026-supplement-title-page.pdf
- MMSEs.py
- SMARTCARB\_divergence.ipynb
- SMARTCARB\_example.ipynb
- Sentinel\_7\_CO2\_2015102311\_o4399\_11932.nc
- Supplementary\_material.pdf
- TROPOMI\_NO2.nc
- TROPOMI\_SO2.nc
- TROPOMI\_divergence.ipynb
- TROPOMI\_example.ipynb
- hyperparameter\_exploration.ipynb

The copyright of individual parts of the supplement might differ from the article licence.
